# Supplementary material
Source: publisher site journal article supplement (https://www.dovepress.com/article/385542)
Supplement: Supplementary file 1 [file get_supplementary_file.php]

**Supplement for the Manuscript: “Quantitative and Qualitative Exploration of Meaningful Change on the Vineland Adaptive Behavior Scales (Vineland™-II) in Children and Adolescents with Autism without Intellectual Disability Following Participation in a Clinical Trial”**

#### Types of Changes Discussed in Daily Living- Child

Study partners were asked to describe the changes they observed in the individual they cared for regarding daily living skills in each of the subdomains (personal, domestic and community).

##### Personal – Child Cohort

There were 29/40 study partners who reported improvements in overall daily living skills on the Study Partner Perception of Meaningful Change (SPPMC), but 30 study partners discussed experiencing changes in the personal subdomain during the interviews. This means that 1 study partner discussed changes within this subdomain but did not report change in overall daily living skills on the SPPMC. Study partners were encouraged to express any changes in the way their child cares for themselves, engaging in personal care (hygiene, getting dressed for example) and whether there were any changes in age appropriate preparation of food and meals for themselves and others. Table S1 outlines illustrations of types of changes observed within the personal subdomain. Study partners provided illustrations of more attentiveness to personal hygiene needs and dressing appropriately as well as an increased awareness of their appearance (24/30). Related to these improvements, there were reports of taking more responsibility and them becoming more self‑sufficient in personal care (21/30). Study partners also described improvements in the preparation of food (16/30). In some cases, this was more willingness to help and contribute to cooking and to preparing their own food. Some study partners also noticed the individual acting more responsibly with regards to taking medications (5/30).

##### Domestic – Child Cohort

Of the study partners who reported changes in daily living skills (29/40), 25 reported improvements in domestic chores. These changes included the individual being more willing to help within the home and follow directions/instructions (21/25) and overall, more compliance with carrying out daily tasks in the home and in some cases, taking the initiative to carry out the chore. (10/25). Selective quotes are presented in Table S2.

##### Community- Child Cohort

Of the study partners who reported improvements in daily living skills (29/40), 25 reported changes within the community domain. Study partners were invited to describe any changes they observed in understanding of money, engagement and participate in the wider community including outside the home but also in social media, and how they manage school. Observed improvements included demonstrating an increased understanding of the use of technology (14/25) and the internet (6/15). There were reports of a positive impact on participation in school (11/25) and a greater interest in the wider community (9/25). Some study partners also described g a greater interest in the value of money (4/25). Selective quotes are presented in Table S3.

#### Meaning of Change (Emergent Themes and Example Quotes) – Child Cohort

For each of the subdomains within the daily living skills domain, study partners who discussed a change were asked to elaborate on what they thought such a change meant for the individual they cared for from the perspective of the study partner. The main themes that emerged from the study partners who reported an improvement within the daily living skills domain were improvement in everyday life and emotional impacts on both study partner and the individual. Each of these themes is described in more detail below and quotes presented in Table S4 and Table S5.

##### Improvement in Everyday Life – Child Cohort

Thirty-one study partners provided examples of the meanings of changes in improvements in everyday life. To note, of the SPPMC for daily living skills, 29 reported improvement.

Study partners expressed that the improvements they observed in daily living skills meant that the individual was more cooperative and helpful in the family home which resulted in less burden and stress for the study partner and resulted in a more “harmonious” family environment (n=21). The study partners reported that not only was the individual more willing to carry out daily tasks, but there was also less stress within the family. Prior to the observed improvements, there was resistant to helping with chores, and needed repeated encouragement which was tiresome for the study partner. Study partners also reported that the individual demonstrated a more positive attitude towards carrying out chores and realized that completing such tasks resulted in rewards such as watching TV or using the iPad. Although study partners noted more compliance with carrying out chores, in some cases, prompting was needed. The helpfulness and cooperation were essential in learning daily living tasks that would support independence. In accordance with this, these improvements in daily living skills were thought to be crucial for independence (21/31). Study partners expressed how they have been concerned about the individual’s future and whether they will be less dependent on them. Several study partners reported that the changes they observed in how the individual cares for themselves, their ability to carry out personal hygiene needs, and showing more interest in their appearance all speak to future self-sufficiency and independence. The increased helpfulness and willingness to carry out home tasks and increased interest in preparing meals also underpinned the increased independence. Study partners described how the increased independence meant more freedom and “ownership” of daily living choices (dressing for example). This also meant that the study partner was able to have less to worry about or need to instruct, but that these changes also “take the pressure” off the study partner and allow more time to give to other members of the family. The importance of an increase in independence was thought to be meaningful making them feel “grown-up” and “his/her own person.” The increased independence was also supported by taking on more responsibility thus contributing to family life; this enabled the study partner to “foster giving him more.”

Study partners also reported more willingness to do things outside of the individual’s comfort zone (16/31). For example, the changes meant that the individual was able to get outside the house more and travel around the neighborhood as well as spend less time in their room. Some study partners also reported more enthusiasm about trying new things which enriched their lives.

There were also reports from study partners that improvements they noticed in daily living skills impacted in how they interacted in the community and how they were more aware of their surroundings (15/31). Study partners observed the individual showing more interest in community events. Some study partners reported how the developing daily living skills were fundamental to future living, being able to live independently for example (10/31).

##### Emotional Impacts on Study Partner – Child Cohort

Study partners described how the improvements they observed impacted on the study partners emotional well-being (11/29). The study partners explained how the individual’s confidence and self‑esteem increased. They noticed the individual was “proud of their achievements.” This sense of pride was echoed in study partners’ narratives (9/11). Some study partners (4/11) specifically described how the sense of achievement increased happiness.

#### Types of Changes Discussed in Communication- Adolescent Cohort

**Types of Changes in Communication**

Study partners were asked to describe the changes they observed in communication skills in each of the 3 subdomains (receptive, expressive, and written). These are summarized below.

##### Receptive Communication-Adolescent Cohort

Of the study partners who reported improvements in communication (29/46), 24 reported improvements in the receptive subdomain. Study partners were encouraged to discuss any changes they observed in how the individual they cared for listens and pays attention to others, whether there were any improvements in their level of understanding, for example, in following instructions. Table S6 provides an overview of the frequency of reports of types of changes recounted by study partners with selective excerpts. Study partners described how concentration had improved and that they were more attentive when listening and processing information (14/24). These improvements led to the enhancement of understanding (7/24) and willingness to follow instructions (5/24).

##### Expressive Communication-Adolescent Cohort

Of the study partners who reported improvements in communication (28/46), 28 described changes in expressive communication skills. Study partners were asked to think about aspects of expressive communication such as asking for information and any improvements in language and grammar. Related to receptive communication, study partners were asked to think about whether there were any improvements in the way the individual managed conversations and express themselves. Seventeen illustrated that the individual was able to maintain conversations for longer and were able to articulate more clearly (8/28). Furthermore, some study partners (5/28) explained that the increase in expressive communication manifested in thoughtfulness and kindness as well as a more censored approach when communicating. Illustrative quotes are provided in Table S7.

##### Reading and Written –Adolescent Cohort

Of the study partners who reported changes in communication (28/46), 16 reported improvements and 1 worsening in writing skills. Study partners were asked to report any changes in the way the individual they cared for expresses themselves in writing and the way they communicate in the written word in texts, letters for example. In addition, any changes in reading skills were explored. Several study partners (10/17) described how they noticed that written skills had improved in terms of legibility and completeness, not requiring so much help from others. For some, (5/16) study partners described an increased interest in reading and better understanding of written text. One study partner gave details of how the individual was producing more elaborate drawings. Illustrative quotes are in Table S8.

One study partner reported worsening of written skills. Prior to the study, the individual needed encouragement to produce written work at school; however, at the end of the study the individual refused to do so. The study partner did expand and wondered whether this was attributed to the timing being at the end of school term, but nonetheless, it was a change noted. This worsening was not reported by the study partner as an overall rating of change on the SPPMC.

#### Meaning of Change (Emergent Themes and Supportive Quotes) – Adolescent Cohort

Study partners were invited to elaborate on the types of improvements they observed in communication skills to gain a deeper understanding of the meaning of changes. Several themes and sub-themes were emergent in the data as detailed in the following sections.

##### Improvements in Everyday Life –Adolescent Cohort

Of the 28 study partners who reported an improvement in communication on the SPPMC, most (n=26) reported how the improvements in receptive and expressive communication and reading and writing skills impacted on aspects of the individual’s daily life experiences. Study partners felt that improvements in communication helped them communicate “what’s happening” in their life, which study partners felt was important as a life skill. As some study partners also reported that they tended to worry about the individual’s communication skills; improvements were considered important.

Study partners described 1 or more meanings of changes which contributed to this theme. Quotes describing the meaning of improvements in everyday life can be found in Table S9. Specifically, 16 reported that the changes in communication had a positive influence for the future in terms of opportunities at college and future employment, as well as interpersonal relationships. The uncertainty of the individual’s future was of concern to study partners, and a sense of relief was exhibited by the study partners that with continued growth there would be more opportunities. The improvements in written skills were considered valuable for study partners, especially to enable more participation in employment fully. Furthermore, the improvements in understanding and following instructions/directions were highlighted as essential to being successful in employment. Study partners highlighted that an improvement in communication is important, especially since they are “raising a future adult.”

In addition, 15 study partners reported that an improvement in communication benefitted performance in school. Study partners felt that improvements in communication skills have helped to have more opportunities to be a part of more advanced classes and witnessed better performance in school, while also giving the study partner the confidence that the individual is learning academically in school. These academic improvements also impacted on understanding of school subjects and subsequently contribute to educational progression.

Improvements in communication also led 7 study partners to report more independence, which was considered important to study partners as the individual’s grow up to become “independent adult[s]” who are “self-sufficient.” One study partner also discussed how improvements in communication helped the study partner to feel safer when giving the individual more independence. Lastly, 1 study partner reported that the improved communication helped the individual to do more things daily, such as getting out of the house and watching television with family members, which was considered important.

##### Strengthened Communication Skills –Adolescent Cohort

There were 31 study partners who reported how observed changes resulted in strengthened communication skills.

Study partners illustrated the meaning of strengthened communication skills and these included better communication with others (n=23). Study partners reported they noticed that the individual they cared for was more engaged during conversations and dialogue was more fluid. These enhanced social interactions with friends and family relationships and increased inclusivity within friendship groups and family dynamics. Examples were presented where small changes such as engaging in “small talk,” willingness to talk about things, spontaneous conversations and responsiveness to discourse were powerful and notable by study partners. One study partner noticed huge changes in how the individual had started to formulate their own sentences which resulted in reciprocal conversations.

Several study partners (n=18) conveyed that improvements in communication skills impacted on the individual they cared for being more able to express their feelings. Study partners felt that improvements in communication help with “self-advocacy” while also helping the study partner to be able to recognize and understand what the individual is feeling. One study partner specifically noted that the ability to understand the individual’s feelings helped the study partner to not have to “walk on eggshells all the time.” The ability to express feelings also impacted on understanding difficult situations, especially in relation to behavior issues at school. The individual they cared for was able to explain the context of tension which then resulted in less blame.

Improved listening and understanding were attributed to improvements in communication by study partners (n=10). These helped the individual to remember aspects of conversations, due to better listening skills, and resulted in better engagement in conversational situations, especially as the individual had previously been unable to understand the feelings of others and properly express themselves in conversation. Furthermore, the impact of improved listening and understanding facilitated better concentration in lectures and retention of information. These changes also impacted on better compliance with instructions and directions resulting in less issues for the study partner. This was also thought to be beneficial to the individual and important to study partners in the future as this could lead to taking on more responsibility.

The strengthening of communication also helped improve confidence (n=6), specifically because the individual was better able to organize thoughts and respond to others “constructively” and not so “fearful of failure.” One study partner was very clear in their description of the meaning of change and that increase in confidence was the most important change and this would impact positively to them long-term.

Study partners reported improvements in communication skills created opportunities for the individual they cared for to express themselves creatively in writing and art (n=4). One study partner noted that although the individual had previously demonstrated imagination and detail, during the study there was greater expression.

Quotes describing the meanings of strengthened communication skills can be found in Table S10.

##### Impact on Study Partner-Adolescent Cohort

Of the study partners who reported an improvement in communication, 11 observed that such improvements also had positive impacts on study partner’s life. Within this broader theme, study partners specified that these changes corresponded to improved ability to understand the individual they cared for (n=8) resulting in enhanced family life and reduced burden for the study partner (n=4). Specifically, 8 reported that an improvement in communication helped study partners understand what the adolescent was thinking, as study partners were able to identify and meet the individual’s needs more effectively during the study. The ability to understand what the individual was thinking also helped the study partner include them in more daily activities, as the improvement in communication skills improved interactions with others.

In addition, study partners (n=4) reported that improvements in communication helped reduce the burden to the study partner and enhance family life. The increased communication skills and study partners understanding of their needs, reduces stress in the family environment.

Quotes describing the meaning of impact on study partners can be found in Table S11.

Table S1. Personal changes – child cohort

| **Type of Change** | **N*/24** | **Exemplary Quotes** |
| --- | --- | --- |
| Improved hygiene/dressing/cares for appearance | 24 | “She didn't care about it before, now she's trying to shower, bathe, wash her hair, and brush her teeth better. Not perfect, but better.” [F-11-Tx-10mg].  “I had to tell him everything to do, a little bit of everything. Wash your teeth and now he's totally good at doing everything. He takes a bath when he takes a bath. He washes his teeth and he knows when I say, "Okay, time for bed," he knows to do all that.” [M-11-Tx-4mg].  “I have always picked out his stuff, but I did start to notice, I would pick certain things out, but he would be like, "No, I don't want to wear that. I want to wear something else.", so I started letting him choose his own clothes after a while.” [M‑9-Tx-10mg]. |
| More cooperative, responsible | 21 | “This time, even though I laid down his clothes, because, I guess, it's just a habit of me doing it, so I lay out his clothes, but he was more responsible getting himself ready, making sure he was, it was properly done.” [M-12-PBO].  “I've seen more independence as far as like... so she has been toilet trained since she was four years old, and even though she is toilet trained, a lot of time she would wait to be taken to the bathroom by an adult. She has recently started taking herself to the bathroom. So that's just like, showing more initiative, so that's been, I'd say over the past six months that was a big change.” [F-7-PBO].  “I believe that there's been a moderate improvement in what he will do for himself. Um, you know, he's more self-sufficient. I'm seeing a lot more self-sufficiency. Um, and just his ability to do things on his own, you know, self-care type things.” [M‑9‑Tx-10mg]. |
| Increased interest in cooking | 16 | “He's good at making his own, like, sandwiches and he'll make his own waffles in the morning. He didn't do that before.” [M-8-Tx-4mg].  “He cracked an egg and the first one went on the floor and we just laughed about it. That was fine. But then he did it again and he did a really good job. Before he would like crush it in his hand and he'd like crack it a little bit and then crush it, so it'd be like shells everywhere. And this time he did it. You know, not adeptly, like an adult would, obviously, but he did it age appropriately, I think.” [M-7-PBO]. |
| Managing own health | 5 | “I guess because in the beginning, I would stand next to him while he did all of that stuff [medications]. And now I don't. Like I trust him to go off on his own and to do it, and I'll check back to make sure that there's nothing left. “Like, I put all the pills in, like, a little cup for him. And I leave out water, but he does everything accurately on his own.” [M-8-Tx-4mg].  “When I tell him to go downstairs and take your meds, he goes downstairs, he gets the right date, he gets what he needs and takes it. Where, before, I would have to just take him, and prompt him and show him the date, and then give it to him. So now he does it. I check every time to see if he's taken the right date. And he'll just choose the right date and he'll take his meds.” [M-9-Tx-4mg]. |

Abbreviations: M, Male; F, Female; Tx, Treatment; PBO, Placebo; mg, milligrams

*Study partners could report more than 1 type of change

Information in brackets includes the following: [Sex-Age-Study Arm]

Table S2. Domestic changes – child cohort

| **Type of Change** | **N*/25** | **Exemplary Quotes** |
| --- | --- | --- |
| Increased willingness to help and follow directions | 21 | “This is the first year that I actually got her to where she would go out and learn how to mow the lawn with a push mower. She didn't wanna do it before. She was scared. So she's starting to learn some more things than she was doing before the study also, that she wasn't doing before.” [F‑11‑Tx‑10mg].  “I believe that he's a little bit more considerate and more willing to help, because he sees that mom does all these things. Oh, he surprised me when he said, "I'm going to wash Dad's clothes," and he did it all on his own.” [M-11-Tx-4mg].  “It seems like he can take that in now, and he can go, "Okay," and he'd do these three things, and he'll do those, without me having to prod him too much.” [M-12-Tx-4mg]. |
| Willingness to do more chores the home | 10 | “He's more open to try different things, I think. He wants to take the clothes out of the washer, put them in the dryer, put the dryer sheet in, turn it on all himself. He's more interested in trying to do other things and help out where I don't think he used to do.” [M-8-Tx-4mg].  “She's happy and she's cooperative and she's asking what can I help with. "Can I help you with dinner? Can I sweep the floor?" "Oh, look mommy, I put the trash bag in." Like she's taking initiative.” [F-7-PBO].  “He'll wash a load of laundry by himself. I was very impressed. Because up until this point, we've never let him do stuff like that. But one day, he told me, he says, "I washed my clothes last night." And I smelled him, and he smelled good. I don't know how much stuff he used, but they smelled amazing.” [F-12-Tx-10mg]. |

Abbreviations: M, Male; F, Female; Tx, Treatment; PBO, Placebo; mg, milligrams

*Study partners could report more than 1 type of change

Information in brackets includes the following: [Sex-Age-Study Arm]

Table S3. Community changes – child cohort

| **Type of Change** | **N*/25** | **Exemplary Quotes** |
| --- | --- | --- |
| Improved understanding of the use of technology (phones, computer, TV) | 14 | “He will text people that we know and we let him. Friends and family, we try to keep a close eye on who he's talking to and what he's saying. But I think that he's doing it more than he used to I would say.” [M-9-Tx-10mg].  “She wasn't even willing to figure out how to use the DVD player. It was not important to her. (Sister's name] could do it, and so why should she? But now, she wants to figure it out.” [M-9-PBO]. |
| Participation in school | 11 | “Yes, in the classroom as well. She is participating. She's helpful when she's supposed to be. She's on task when she's supposed to be. I've heard no complaints and no negative anything other than she does a whole lot of whistling, which is probably a stim if I had to guess earlier on in the year and that stopped.” [F-7-PBO].  “Where he didn't used to want to do school work and homework, he has gotten to the point where he's accomplishing it, and so he's decided the way to get around it is to get it done in school.” [M-11-Tx-10mg]. |
| Improved understanding of general society | 9 | “On the study he did have about a 20% more interest in going away with me for weekends, and his brother, and you know experiencing different things. Like we went to Georgia and Alabama just after Christmas, and he was very interested in the people there, the food there, you know? He was much more enthusiastic on the medication.” [M-10-PBO].  “They [private school] have mass and he tried to reach out for the small pieces of bread that they give. And so his teacher want us to talk to him about it. I told him he cannot do this until he has his first communion and he was really paying attention and asked why. I told him why and he was like, ‘Okay. So this is not allowed?’ ‘No it's not.’ So this is why. And he was fine with it. He knows why he cannot do it. And if it is a rule he cannot break it. So yes, it was an improvement.” [M-6-PBO]. |
| Improved understanding of internet | 6 | “I would say she's got more sophisticated with it [use of internet] over in recent months.” [F-11-PBO].  “He is more cautious about the internet and posting things and someone being able to track him and find him, so that has increased. And I didn't even have to teach him that, and he said that someone could track him on his IP or something like that. So he was cautioning his brother about, liking something or I don't know.” [M-9-PBO]. |
| Improved understanding of money | 4 | “Where before it wasn't significant to him [money], he’s asking about cost, now. Which he didn't before. ‘How much is this going to cost, mom? You know? Or if I give him a dollar amount, he tries to stay within the budget. But he's actually doing pretty good.” [M-9-Tx-4mg]. |

Abbreviations: M, Male; F, Female; Tx, Treatment; PBO, Placebo; mg, milligrams

*Study partners could report more than 1 type of change

Information in brackets includes the following: [Sex-Age-Study Arm]

Table S4. Improvements in everyday life due to daily living skills - child cohort (n=31)

| **Meaning of Change** | **N*** | **Exemplary Quotes** |
| --- | --- | --- |
| “The daily living skills. That, that piece, that cooperativeness piece, uh, where she's actually participating in school and she's being more helpful at home. Just more agreeable. That's, that's been the biggest, most important piece for her, because it's changed so much else.” [F-7-PBO]. | | |
| More helpful and less burden to study partner | 21 | “He’s much more willing to help out, and when you do ask him to do something, he’s more willing to do it without being asked repeatedly. And he enjoys doing it.” [M‑9‑Tx‑10mg].  “It’s more like he didn't really help with anything because it was more work trying to teach him it than just to do it ourselves and, and like cleaning his room with his sister and stuff. So it's better in that respect that, it's more fair. Like before, he didn't have to do anything. So now it kind of makes it more harmonious in the family and gives us more hope for him.” [M-8-Tx-4mg].  “I've noticed if we break things down into small tasks and make it a game, he is more receptive to that now. And he actually adds his own little flair to the game, which he didn't used to do before. Now, we have a stopwatch (laughs) and I say, ‘Okay, first job is all the trash. Get all the trash out of your room.’ And, he would do that. But then he added, he has a little thing called a Gurkey Turkey, it makes a noise. So for me to stop the stopwatch, he squeezes the Gurkey Turkey. So I think I feel like he's taking the game and like wanting to be more involved in it and put his own little personal spin on it and that's helping him do some tasks like cleaning.” [M-7-PBO].  “Well, so, he's doing a lot better. When I ask him to do a task, he'll complete the task. Where before, he would just, I don't know if it was daydreaming or what, but he would always, like, forget or not do it. I literally had to just stand over him to get the task completed. But now he can just pretty much just do it. And, even, like, helping me unload the groceries, and putting away the shopping cart. He's very helpful. He does it all.” [M-9-Tx-4mg].  “He's more willing to, when you say ‘Hey, we're gonna eat in 10 minutes, can somebody set the table?’ He's either willing to say ‘Oh, I'll do it,’ or ‘I would prefer to clear the dishes.’ Then he'll work that out with his sister. So those would be the only changes. A little bit of compromise.” [M-10-PBO].  “Where we used to have to have a chart up to get him to do any of his chores. We've not had to have the chart up probably in two or two and half months. Just basically quit. And he's still able to do his daily chores. It’s awesome, knowing that, that we can count on him or that, that he's going to do something that he's supposed to.” [M-7-Tx-10mg].  “I believe that he sort of realized that he had to pitch in as well because everybody was busy, and he said, ‘You know what? I need to move. I need to help out.’ He hugged me and then he said, ‘I don't like washing the dishes, but I can do the laundry. I'll help you.” [M-11-Tx-4mg].  “It's nice that he doesn't have to get us up in the morning when he wakes up, he could just make his own waffle. So that gives us extra sleep.” [M-8-Tx-4mg].  “He takes his bath in the morning and I run his bath water just because I don't want the water too hot… I'll come back in about five minutes, he's washed, we're getting out, he's drying, and so I can go do other things while he takes care of getting himself ready. So it definitely frees up more time and takes pressure off me. And that allows me time to spend with his brother as well, who also needs some help sometimes.” [M-9-Tx-10mg]. |
| Increased independence | 21 | “It's really great knowing that he's not as dependent upon us. I think it gives him a little more freedom.” [M-7-Tx-10mg].  “We finally have gotten to a point where she has the independence that she wants. She wants this independence, but she hasn't always been very clear on how to get it and what she has to do to make it happen. Her having that independence makes a difference for us, because I'm not as worried about her being able to learn new skills, skills she's going to need.” [F-10-Tx-10mg].  “Well, it, it frees me up, you know? I don't have to be so hands on and it just gives him some ownership as to what he wears and allows him to take pride in what he's wearing and, those choices himself, and it's not something I have to manage, so it's definitely been an improvement.” [M-9-Tx-10mg].  “Important [helping around the home], it makes him feel good, it makes him feel like a grown person. Like, ‘I'm grown up, I'm helping out, look.” [M-12-PBO].  “Well, for us it's just, it, you know, it's, it's a sense of having him, letting him be a part of, you know, the bigger picture of the family, you know? So, like it gives him a sense of, of a job to do within the family, something to do that's helping. Like it's just the three of us. It's my husband, myself and {Child’s name}. So, you know, it gives him a sense of responsibility and he's doing something and contributing something to the family. So like, it's really a big deal for him and we love being able to foster giving him more.” [M-10-PBO].  “I feel like he feels like he's his own person, like he's not just settling. I feel like he's a big deciding factor in his personal life.” [M-9-PBO].  “It was an improvement, and I am glad that he was able to get home from school by himself. Because that gives him a sense of accomplishment and that's always a good thing. … He's starting to do laundry by himself, and trying to load the dishwasher and help out. And you know, walking home by himself. Just his independence is growing.” [F-12-Tx-10mg]. |
| Willing to do more | 16 | “So the fact that he's not in his room and I get to see him more often, and even if he's not necessarily talking to me, I still get to see my kid, you know? He's partaking in something with other people. Now we're working on how he does that, but at the moment at least he's interested and comes out of hibernation for a little bit. That's a big thing.” [M-12-PBO].  “I don't know if he notices it, but, again, it's that more willing to try new things. To be open to new things. And I think if he really sat down and thought about it, he's tried a lot of new things over the last six months that he would've been completely resistant to.” [M-10-PBO]. |
| Increased awareness of surroundings | 15 | “The wider community, yes actually. There was a slight improvement that he would want to go out for a walk or mix with people in the community where we live. He generally wanted to interact more, so that was both in the home, in school, and in the community as well. Things that were going on, art shows, community events in that, he was actually very keen to attend those when I'd arrange them.” [M-10-PBO].  “I think following the rules must be the main one [most important improvement]. Because now it's language understanding also it's learning about consequences and why shouldn't he be doing things. It's because that's how society works. So trying to fit into society. That's an important thing.” [M-6-PBO].  “He said, ‘Yeah, I'll take part. I'll be a reader [at Sunday school] if they need a reader,’ which most of the older kids did. So I said, ‘Hey, if you need another reader he's happy to do it.’ But I talked to him several times like, ‘Are you sure you want to do this?’…. And for him to actually say yes, I think that's a huge move in the right direction. Like for him to like go out there and put himself out there it's just a difference that he was so comfortable in doing that.” [M-10-PBO]. |
| Positive influence on future | 10 | “Well, it's important and it's actually crucial when he gets older, he needs these skills. When he gets his own apartment, I know I'm looking into the future, but even from now, every night when he goes to bed I clean up the kitchen stuff, it's crucial because he needs to know that I'm not going to go over to his house every day and clean up his kitchen and wash his dishes. But it's really important that he knows that you need to clean up your house, you need to do this and you need to do that.” [M-12-PBO].  “I mean in the future, it’s important to know that like certain things have to be done. You know, you can leave your bed unmade and the world isn't going to come to a screeching halt. That you need to wash your dishes. You need to brush your teeth. You need to take a shower, because without doing those things, you can't function in society. It's nice that she's functioning now.” [F-7-PBO].  “So it makes me think that he can be a little more successful in his future life, not necessarily dependent on an adult.” [M-11-Tx-10mg]. |

Abbreviations: M, Male; F, Female; Tx, Treatment; PBO, Placebo; mg, milligrams

*Study partners could report more than 1 type of change

Information in brackets includes the following: [Sex-Age-Study Arm]

Table S5. Emotional impacts on study partner – child cohort

| **Meaning of Change** | **n** | **Exemplary Quotes** |
| --- | --- | --- |
| Improved self-esteem | 9 | “He feels like that he’s growing up. And that he's getting more mature. I'm sure that has to increase his self-esteem.” [M-9-Tx-4mg].  “Every time he's able to do something, I can see the pride in him and how happy he is and how excited he is that he's able to do something and he takes ownership in that. So, I know it's a big deal for him.” [M-10-PBO].  “She is aware of the changes regarding house rules. She knows she's not being yelled at as much anymore and she brings that up a lot. She says, you know, "I'm happy that I'm following the rules." And, you know, she'll brag them like, "I brush my teeth just like I'm supposed to." That sort of thing. So she's proud of the achievement that she's reached.” [F-7-PBO]. |
| Happier | 4 | “I don't know if he knows that the new thing, but I know that he feels accomplished when he does things, he feels like really happy when he's able to help and he gets so excited when he gets to do the laundry.” [M-10-PBO]. |

Abbreviations: M, Male; F, Female; Tx, Treatment; PBO, Placebo; mg, milligrams

*Study partners could report more than 1 type of change

Information in brackets includes the following: [Sex-Age-Study Arm]

Table S6. Receptive changes – adolescent cohort

| **Type of Change** | **N/24*** | **Exemplary Quotes** |
| --- | --- | --- |
| More attentive | 12 | “So, he's better able to listen and pay attention while he was on the study meds, than he ever was before.” [M-14-Tx-4mg].  “I said that he's chiming into things. We were so used to him never listening and having to repeat myself over and over to him, almost like he's in his own world. Yes, he listens a lot, lot more.” [M-15-PBO]. |
| Better understanding | 7 | “She was able to, instead of just 30 seconds or a minute worth of attention span, she was able to sit through an entire lecture or whatever. Retain what she's hearing, what she's doing and be able to explain it to you.” [F‑14‑Tx‑4mg]. |
| Better at following instructions | 5 | “What I noticed a big change on was being able to follow multi-step directions.” [M-13-Tx-10mg]. |

Abbreviations: M, Male; F, Female; Tx, Treatment; PBO, Placebo; mg, milligrams

*Study partners could report more than 1 type of change

Information in brackets includes the following: [Sex-Age-Study Arm]

Table S7. Expressive changes – adolescent cohort

| **Type of Change** | **N/28*** | **Exemplary Quotes** |
| --- | --- | --- |
| Able to maintain conversations | 17 | “He ended up going and having a really good time and having a conversation with this guy that lasted at least half an hour or an hour or so, over you know, just stuff that he liked. So could have a back and forth conversation with someone about that certain topic that he liked.” [M-14-PBO].  “Now he’s having full-blown conversations, even about stuff that he's not into.” [M-15-PBO]. |
| More articulate | 8 | “Prior to the medication, he would have a difficult time explaining to you the situation at school that he got in trouble for. Now he can easily express what happened, what his role was, what the other child did. He couldn't have done that before.” [M-14-Tx-10mg].  “She was able to communicate if she's happy or sad or someone or if someone's bullying her and how that made her feel. If something happened in school, she was able to tell us in words how that translated into her feelings and what's actually going on in the school.” [F‑14‑Tx‑4mg]. |
| More thoughtful and considered | 5 | “He would kind of censor himself a little bit more, give a little more time. It's not much time, these kids give themselves before they say stuff, but like think about it a little bit longer before it would come out.” [M-15-PBO]. |

Abbreviations: M, Male; F, Female; Tx, Treatment; PBO, Placebo; mg, milligrams

*Study partners could report more than 1 type of change

Information in brackets includes the following: [Sex-Age-Study Arm]

Table S8. Reading and writing changes – adolescent cohort

| **Type of Change** | **N/16*** | **Exemplary Quotes** |
| --- | --- | --- |
| Improved writing | 10 | “Writing was very much improved. She was writing like a third grader. It was becoming very legible now.” [F-14-Tx-4mg].  “And then during the study I noticed that she was able to write more of a complete sentence without asking for help.” [F-17-Tx-4mg]. |
| Improved reading | 5 | “She's always loved to read but it was more the concept or understanding what she was reading. Then during the study her comprehension seemed to improve.” [F-17-Tx-4mg].  “We believe, it’s because with the medication he can focus better and read and understand and really hold his attention.” [M-14-Tx-10mg]. |
| Improved drawing | 1 | “Two weeks after starting the study, he came home from school with elaborate drawings.” [M-14-Tx-10mg]. |

Abbreviations: M, Male; F, Female; Tx, Treatment; PBO, Placebo; mg, milligrams

*Study partners could report more than 1 type of change

Information in brackets includes the following: [Sex-Age-Study Arm]

Table S9. Study partner quotes: improvements in everyday life – adolescent cohort

| **Meaning of Change** | **N*** | **Exemplary Quotes** |
| --- | --- | --- |
| Positive influence on future (college, jobs, relationships, etc.) | 16 | “The closer he gets to high school, that’s really going to be important, to be able to adequately get his point across and listen to other peoples’ opinions and have that back and forth.” [M-13-Tx-4mg].  “It’s a good thing, because it means he’s, going a little bit further academically, which opens up more doors, you know, in the future.” [M-13-Tx-4mg].  “I think as a parent, you're always worrying about your kids. I really would love to be able to be confident that he will be able to do all those things that we think he should be able to do, and that would be a huge relief for us.” [M-15-PBO].  “You just have to be able to express yourself well on paper. If he wants to design video games, at some point you have to be able to write that user’s manual too. And if he can’t write the user manual, you may have designed an awesome game, but if you can’t tell anybody else how to play it. You can’t go to thousands of people and say, ‘Here, let me tell you how to do this’.” [M-15-Tx-10mg].  “Extremely important, because when you get into real life, and you get a full-time job and you’re responsible for your actions, and you’re no longer a minor under a parent’s care. You need to watch what you say and how your body acts.” [M-15-Tx-10mg]. |
| Academic growth | 15 | “It means, we can trust if she’s at school, she’s actually learning what she’s supposed to be learning, instead of she’s in the classroom and she’s just there for attendance.” [F-14-Tx-4mg].  “I would say within two weeks, the teachers were all noticing a difference and they were emailing me, you know, commenting on how much better his behavior was and he was actually trying harder and seemed to be more concerned about his work and his grades, where prior to the medication he just, you know, he didn't care. [M-14-Tx-10mg].  “No, she’s always been very well written and, she’s never really had a problem with school too much. She did have some problems with reading comprehension, but she’s gotten to grade level now. And honor roll… she did mostly As, Bs, and maybe one or two Cs in our last district. And then when we moved in December when we started the study we changed to a different district, and she’s doing so much better. She’s been A/B honor roll almost the entire time. Like most of the school year.” [F-15-PBO].  “It gives him more opportunities to be in regular classroom, rather than, a resource room which is what he desires. So this year, he was able to move into some more regular classes. He just takes one resource room class now and as long as he’s getting the right support, it’s a good thing, because it means he’s, going a little bit further academically, which opens up more doors in the future, if he can continue learning the skills he needs.” [M-13-Tx-4mg]. |
| Increased independence and inclusivity | 7 | “Well, it’s extremely important as far as him growing up and becoming an independent adult. If he can’t listen and do what he’s told, he’s not going to be able to go, to be able to get anywhere in life.” [M-15-PBO].  “I mean, we want him to be as self-sufficient as he can be and we want him to achieve his personal best, whatever that may be. And I just think if, you know, in this day and time, if you can’t read and write, you know, you’re somewhat left behind. So it’s important.” [M-14-Tx-10mg].  “I feel safer more, than, with, you know, releasing more independence to him.” [M‑15-PBO]. |

Abbreviations: M, Male; F, Female; Tx, Treatment; PBO, Placebo; mg, milligrams

*Study partners could report more than 1 type of change

Information in brackets includes the following: [Sex-Age-Study Arm]

Table S10. Study partner quotes: strengthened communication skills – adolescent cohort (n=31)

| **Meaning of Change** | **N*** | **Exemplary Quotes** |
| --- | --- | --- |
| Better communication with others (family, friends, etc.) | 23 | “He's able to engage more in, in the conversation, which means he's, kind of, listening, he's directing his attention towards people.” [M-13-PBO].  “It’s nice to have her attention for a little while, and for her to have that more of the face-to-face connection, then having these conversations over text. [F-13-Tx-10mg].  “Well, I think it's helped him with his friends. That he's able to be more of a friend. A better friend, you know, to listen and be able to have an actual conversation instead of just kind of a one way, ‘Hey, this is what I want to talk about,’ kind of a thing.” [M‑13-Tx-4mg].  “Well, he just seems more, more of a part of the family. Like, he's better bonded to us and, you know, like, when something happens in school, he can tell us exactly what his part was.” [M-14-Tx-10mg].  “Out of all the things that I have seen the most, that I have found to be the most beneficial has been, with his communication, has been his ability, to be open to communication, being open to hearing rationalizations, and being able to talk that back and tell me what he understands from it, to tell me what, why he sees that to be of value. That's what has been, the most important. His willingness to try.” [M-16-PBO].  “Amazing- amazingly long conversations. So, when we go visit Grandpa, and when it's just him and I in the car and there's nobody else to interrupt us, he and I can talk the whole time and not just about his topics that he likes. He would talk about things that I like to talk about. Now, I'm not going to talk about you know, bizarre, "Hey, world politics," - no 14-year-old is gonna engage me with that.” [M-13-Tx-10mg]. |
| Improved expression of feelings | 18 | “I think better [family dynamics] since you don’t have to walk on eggshells all the time. Which it is when she’s in one of her moods, like you don’t know what’s bothering her, so you’re trying to guess what’s bothering her.” [F-14-Tx-10mg].  “It’s very important because if he’s upset or something, we need to know what’s going on. If he’s happy, well maybe we should do like an award or something like I’ve been telling him. But if he has something, say something happened at school and he needed to sit down and talk about it, he needs to open up and talk.” [M-15-Tx-10mg].  “She was able to communicate if she's happy or sad or someone or if someone's bullying her and how that made her feel. If something happened in school, she was able to tell us in words how that translated into her feelings and what's actually going on in the school.” -.” [F-14-Tx-4mg].  “If he’s able to converse as opposed to melting down when, you know, and explain why he is averse to doing something or what’s, you know, what’s going on in his brain. It makes family life a whole lot more pleasant. It just generally makes communicating with [child’s name] easier, because we’re able to say, ‘[child’s name] we need you to do or stop doing something.’ And he can say ‘this is the reason that I want to continue doing that.’ As opposed to just having a little meltdown and having a major problem there.” [M-15-Tx-10mg].  “He tells you exactly like it is. So, you know, then you get the story how much of it was his part and how much of it was another kids part but, you know, we don’t like seeing him getting in trouble, and now that he can communicate, we find out that, you know, sometimes it’s a situation where he didn’t provoke it at all, it was actually another child.” [M-14-Tx-10mg]. |
| Improved listening and understanding | 10 | “I think they’re really important for us because he, it would help a lot, as he gets older for him to be able to take on a little bit more responsibility. And, be a little more – I know we’re gonna get into this too, but for him to listen and take direction a little bit better, and being able to have, you know, just, kind of, more direct, one to one communication, so that you know, and him acknowledge that he’s listening and that you know that he’s hearing what you’re saying.” [M-13-Tx-4mg].  “She doesn't have to have things repeated as much from, I don't know if it's inattentiveness or what, but she seems to grasp it better on the first, like, time you say it instead of saying, "Hey, you need to do this. You need to do this." You know, constantly being reminded.” [F-14-Tx-10mg].  “If he's paying attention then he's following instructions then we have less issues. We're very fair I feel like with our kids, so if we ask them, or need them to do something, we need them to follow instructions, so they'll do it.” [M-13-PBO].  “What I noticed a big change on was being able to follow multi-step directions… you’ve got to be able to… you’ve got to, you know, be able to do that kind of thing to hold a… to do well in school… that could really lock him out of a whole bunch of things, if he wasn’t able to follow directions.” [M-13-Tx-10mg].  “Just him being able to, do more for himself and, you know, when you ask him to do something, communicate it, a lot of times before it would never get done. And now you just, you know, ask him once, maybe twice, and then, and then he takes care of it.” [M-14-Tx-10mg]. |
| Increased confidence | 6 | “She is just a little bit louder… the more she does it, she’s just getting more confident to keep it up.” [F-17-10mg].  “I think he is better able to, I guess, kind of organize his thoughts, maybe, and respond to other people’s thoughts constructively. Instead of just worrying about his own.” [M-13-Tx-4mg].  “It certainly feels that he's a little bit more confident. He certainly wants to raise his hand, or participate, or have something to add to the conversation, or, he definitely does very well with being asked a question and then responding back. [M-16-PBO]. |
| Increased creativity | 4 | “So he’s keeping a journal. Sometimes he does art. He draws, and he also does origami. So, I think sometimes that might be how he expresses his feelings as well through his origami and through his art. There’s a lot more art like origami stuff going around in the house. As I said, I think he was more in-tune to his feelings.” [M‑15‑Tx‑10mg].  “He did become much more creative in what he was drawing and he was very detailed and I don't think that that's necessarily something that they're expecting to see, but I do, I did really wonder if it wasn't affecting the creative part of his brain.” [M‑14‑Tx‑10mg]. |

Abbreviations: M, Male; F, Female; Tx, Treatment; PBO, Placebo; mg, milligrams

*Study partners could report more than 1type of change

Information in brackets includes the following: [Sex-Age-Study Arm]

Table S11. Study partner quotes: impact on study partner – adolescent cohort (n=11)

| **Meaning of Change** | **N*** | **Exemplary Quotes** |
| --- | --- | --- |
| Improved ability to understand what adolescent is thinking | 8 | “Well, when he can express himself without getting angry, then we are able to find what, you know, what his needs and meet his needs a little bit more than when he can't tell us.” [M-13-PBO].  “It would be important that he can explain it cause sometimes he just does things that we just simply don’t understand. We don’t understand. So, if he can explain himself in a way that we can understand why some things are so peculiar, or upsetting, yeah, it’s helpful.” [M-16-PBO].  “I think it’s better because then I have an idea of where he’s coming from and what I need to do or what kinda needs to change a bit in the household, so I think it’s better.” [M-16-Tx-10mg]. |
| Reduced burden and enriched family life | 4 | “That’s also pretty important, I think. You know, it definitely helps the way that we get along with each other and with him, to know that he is capable of give and take, and that we’re not always having to butt heads over, you know, his way or the highway kind of a thing.” [M-13-Tx-4mg].  “There are less arguments and less battles about are you going to do this. How many times do I ask you, getting help around the house. Just less stress in general, and not having to, you know, argue about get in the bathtub, you know, for 45 minutes. If I tell her to take a bath, the expectation is she'll just go take a bath, and she'll do it with minimal fuss instead of the maximum fuss I was getting before.” [F-13-Tx-10mg]. |

Abbreviations: M, Male; F, Female; Tx, Treatment; PBO, Placebo; mg, milligrams

*Study partners could report more than 1 type of change

Information in brackets includes the following: [Sex-Age-Study Arm]

Table S12. SPPMC communication ratings by MCT met/not met on VAB-2DC

| **SPPMC Rating (Showing Only Those Selected for Interview)** | | | | | | |
| --- | --- | --- | --- | --- | --- | --- |
| Change on Vineland™-II 2DC (n=86) | Very Much Improved  n=19 | Much Improved  n=24 | Minimally Improved  n= 18 | No change  n= 22 | Minimally Worse  n=1 | Missing  n=2 |
| ≥MCT (met) (n=29; 13 child/16 adolescent | 8  (4 child/  4 adolescent) | 8  (5 child/  3 adolescent) | 6  (2 child/  4 adolescent) | 7  (2 child/  5 adolescent) | 0 |  |
| <MCT (not met) (n=57; 27 child/30 adolescent) | 11  (6 child/  5 adolescent) | 16  (11 child/ 5 adolescent) | 12  (5 child/ 7 adolescent) | 15  (4 child/ 11 adolescent) | 1 child | 2 adolescents |

Abbreviations: SPPMC, Study Partner Perception of Meaningful Change; MCT, Meaningful Change Threshold; VAB-2DC, VinelandTM-II 2 Domain Composite Score

Table S13. SPPMC daily living skills ratings by MCT met/not met on VinelandTM-II 2DC

| **SPPMC Rating (Showing Only Those Selected for Interview**) | | | | | | | |
| --- | --- | --- | --- | --- | --- | --- | --- |
| Change on Vineland™-II 2DC (n=86) | Very Much Improved  n=7 | Much Improved  n=22 | Minimally Improved  n=24 | No change  n=30 | Minimally Worse  n=1 | Much Worse  n=1 | Missing  n=1 |
| ≥MCT met (n=29; 13 child/16 adolescent | 3  (2 child/1 adolescent) | 10  (5 child/5 adolescent) | 7  (2 child/5 adolescent) | 9  (4 child/5 adolescent) | 0 | 0 | 0 |
| <MCT  (n=57; 27 child/30 adolescent) | 4  (1 child/3 adolescent) | 12  (9 child/3 adolescent) | 17  (10 child/7 adolescent) | 21  (7 child/14 adolescent) | 1  (adolescent) | 1  (adolescent) | 1  (adolescent) |

Abbreviations: SPPMC, Study Partner Perception of Meaningful Change; MCT, Meaningful Change Threshold; VAB-2DC, VinelandTM-II 2 Domain Composite Score

Table S14. SPPMC socialization ratings by MCT met/not met on VinelandTM-II 2DC

| **CaPMC Rating (Showing Only Those Selected for Interview)** | | | | | | |
| --- | --- | --- | --- | --- | --- | --- |
| Change on Vineland™-II 2DC (n=86) | Very Much Improved  n=18 | Much Improved  n=21 | Minimally Improved  n=26 | No change  n=19 | Minimally Worse  n=1 | Missing  n=1 |
| ≥MCT met (n=29; 13 child/16 adolescent | 7  (4 child/3 adolescent) | 7  (5 child/2 adolescent) | 9  (1 child/8 adolescent) | 6  (3 child/3 adolescent) | 0 |  |
| <MCT  (n=57; 27 child/30 adolescent) | 11  (5 child/6 adolescent) | 14  (10 child/4 adolescent | 17  (6 child/11 adolescent) | 13  (6 child/7 adolescent) | N=1 adolescent | N=1 adolescent |

Abbreviations: SPPMC, Study Partner Perception of Meaningful Change; MCT, Meaningful Change Threshold; VAB-2DC, VinelandTM-II 2 Domain Composite Score.

Table S15. SPPMC overall ASD ratings by MCT met/not met on VinelandTM-II 2DC

| **SPPMC Rating (Showing Only Those Selected for Interview)** | | | | | |
| --- | --- | --- | --- | --- | --- |
| Change on Vineland™-II 2DC (n=86) | Very Much Improved  n=15 | Much Improved  n=24 | Minimally Improved  n=25 | No Change  n=18 | Missing  n=4 |
| ≥MCT met (n=29; 13 child/16 adolescent | 8  (5 child/3 adolescent) | 6  (3 child/3 adolescent) | 7  (2 child/5 adolescent) | 6  (2 child/4 adolescent) | 1  (child) |
| <MCT  (n=57; 27 child/30 adolescent) | 7  (5 child/2 adolescent) | 18  (10 child/8 adolescent) | 18  (6 child/12 adolescent) | 12  (6 child/6 adolescent) | 3  (adolescent) |

Abbreviations: ASD, autism spectrum disorder; SPPMC, Study Partner Perception of Meaningful Change; MCT, Meaningful Change Threshold; VAB-2DC, VinelandTM-II 2 Domain Composite Score.

Table S16. List of Sites and IRBs (aV1ation Study)

| **Site Number** | **Local/Central IRB and Local IRB Address** |
| --- | --- |
| 293537 | Central IRB  Advarra  6940 Columbia Gateway Dr. Suite 110  Columbia, MD 21046 |
| 293538 | Central IRB  Advarra  6940 Columbia Gateway Dr. Suite 110  Columbia, MD 21046 |
| 293685 | Central IRB  Advarra  6940 Columbia Gateway Dr. Suite 110  Columbia, MD 21046 |
| 293686 | WIRB  1019 39th Avenue SE Suite 120  Puyallup, WA 98374-2115 |
| 293687 | Central IRB  Advarra  6940 Columbia Gateway Dr. Suite 110  Columbia, MD 21046 |
| 293688 | Advarra (local IRB Chesepeake acquired by Quorum/Advarra; still considered local for this study)  6940 Columbia Gateway Dr. Suite 110  Columbia, MD 21046 |
| 293690 | Central IRB  Advarra  6940 Columbia Gateway Dr. Suite 110  Columbia, MD 21046 |
| 293691 | Central IRB  Advarra  6940 Columbia Gateway Dr. Suite 110  Columbia, MD 21046 |
| 293692 | Central IRB  Advarra  6940 Columbia Gateway Dr. Suite 110  Columbia, MD 21046 |
| 293693 | Vanderbilt HRPP IRB  1313 21st Ave South Suite 505  Nashville, TN 37232 |
| 293694 | Central IRB  Advarra  6940 Columbia Gateway Dr. Suite 110  Columbia, MD 21046 |
| 294087 | DukeHealth IRB  2424 Erwin Rd  Suite 405  Durham, NC 27705 |
| 294088 | Central IRB  Advarra  6940 Columbia Gateway Dr. Suite 110  Columbia, MD 21046 |
| 294105 | BRANY IRB  1981 Marcus Ave  Suite 210  Lake Success, NY 11042 |
| 294106 | Yale HRPP IRB  25 Science Park, 3rd Fl, 150 Munson St  New Haven, CT 06520-8327 |
| 294107 | UCSF HRPP IRB  490 Illinois Street  Floor 6  San Francisco, CA 94143 |
| 294108 | Central IRB  Advarra  6940 Columbia Gateway Dr. Suite 110  Columbia, MD 21046 |
| 295491 | Central IRB  Advarra  6940 Columbia Gateway Dr. Suite 110  Columbia, MD 21046 |
| 295492 | Cincinnati Children's Hospital IRB  3333 Burnet Avenue  MLC 7040  Cincinnati, OH 45229 |
| 295534 | University of Massachusetts Medical School IRB  Venture Way Center  100 Venture Way, Suite 201  Hadley, MA 01035-9450 |
| 295535 | Central IRB  Advarra  6940 Columbia Gateway Dr. Suite 110  Columbia, MD 21046 |
| 295536 | Central IRB  Advarra  6940 Columbia Gateway Dr. Suite 110  Columbia, MD 21046 |
| 295537 | Central IRB  Advarra  6940 Columbia Gateway Dr. Suite 110  Columbia, MD 21046 |
| 295538 | Central IRB  Advarra  6940 Columbia Gateway Dr. Suite 110  Columbia, MD 21046 |
| 295539 | Mass General Brigham IRB  399 Revolution Drive  Suite 710  Somerville, MA 02145 |
| 295540 | Central IRB  Advarra  6940 Columbia Gateway Dr. Suite 110  Columbia, MD 21046 |
| 295541 | Central IRB  Advarra  6940 Columbia Gateway Dr. Suite 110  Columbia, MD 21046 |
| 295544 | Weill Cornell Medicine IRB  Mailing Address:  1300 York Avenue Box 89 New York, NY 10065 Office Address:  575 Lexington Avenue 9th Floor  New York, NY 10022 |
| 295781 | Rush University Medical Center IRB  Office of Research Affairs 1653 West Congress Parkway  Chicago, Illinois 61612-3833 |
| 295804 | Central IRB  Advarra  6940 Columbia Gateway Dr. Suite 110  Columbia, MD 21046 |
| 296372 | Partners Human Research  399 Revolution Drive  Suite 710  Somerville, MA 02145 |
| 296761 | Central IRB  Advarra  6940 Columbia Gateway Dr. Suite 110  Columbia, MD 21046 |
| 296871 | WIRB  1019 39th Avenue SE Suite 120  Puyallup, WA 98374-2115 |
| 296872 | WIRB  1019 39th Avenue SE Suite 120  Puyallup, WA 98374-2115 |
| 296873 | WIRB  1019 39th Avenue SE Suite 120  Puyallup, WA 98374-2115 |
| 296935 | Central IRB  Advarra  6940 Columbia Gateway Dr. Suite 110  Columbia, MD 21046 |
| 297189 | Boston Children's Hospital IRB  300 Longwood Avenue  Mailstop BCH 3164  Boston, MA 02115 |
| 301182 | Nathan Kline Institute IRB  140 Old Orangeburg Rd  Orangeburg, NY 10962 |
| 307562 | Central IRB  Advarra  6940 Columbia Gateway Dr. Suite 110  Columbia, MD 21046 |
| 307563 | Central IRB  Advarra  6940 Columbia Gateway Dr. Suite 110  Columbia, MD 21046 |
| 307598 | Central IRB  Advarra  6940 Columbia Gateway Dr. Suite 110  Columbia, MD 21046 |
| 309514 | Central IRB  Advarra  6940 Columbia Gateway Dr. Suite 110  Columbia, MD 21046 |
| 309517 | Central IRB  Advarra  6940 Columbia Gateway Dr. Suite 110  Columbia, MD 21046 |
| 311098 | John Hopkins Medicine IRB  1620 McElderry Street Reed Hall, Suite B-130  Baltimore, MD 21205-1911 |

Abbreviations: IRB, Institutional Review Board

Figure S1. CDF curves showing Vineland™-II 2DC domain score change from Baseline to Week 24.

CDF of Change in VinelandTM-II 2DC[1] from Baseline to Week 24 Stratified by OACIS-S Overall[2] Category (LAP_F)

Abbreviations: CDF, Cumulative Distribution Function; OACIS-S, Ohio Autism Clinical Impression Scale of Severity, LAP_F, Longitudinal Analysis Population Full

[1] The VinelandTM-II is a clinician assessment based on parent report. Domains include: Socialization, Communication, Daily Living Skills, and 2DC (a 2-domain composite score of Communication and Socialization). The total score is reported as the Adaptive Behavior Composite (ABC) Score. Higher score indicates better adaptive functioning.

[2] OACIS-S a clinician rating consisting of 4 one-item assessments: Overall, Verbal, Non-verbal, Social Interactions. Higher score indicates higher severity.

[3] Longitudinal Analysis Population Full (LAP_F) includes participants from the full ITT who have provided responses at baseline and the respective follow-up visits.

Analysis datasets: AQS

**CDF of Change in VinelandTM-II 2DC[1] from Baseline to Week 24 Stratified by OACIS-Improvement Non-verbal[2] Category (LAP_F)**

Abbreviations: CDF, Cumulative Distribution Function; OACIS-I, Ohio Autism Clinical Impression Scale of Improvement, LAP_F, Longitudinal Analysis Population Full

[1] The VinelandTM-II is a clinician assessment based on parent report. Domains include: Socialization, Communication, Daily Living Skills, and 2DC (a 2-domain composite score of Communication and Socialization). The total score is reported as the Adaptive Behavior Composite (ABC) Score. Higher score indicates better adaptive functioning.

[2] OACIS-I a clinician rating consisting of 4 one-item assessments: Overall, Verbal, Non-verbal, Social Interactions. Lower score indicates greater improvement.

[3] Longitudinal Analysis Population Full (LAP_F) includes participants from the full ITT who have provided responses at baseline and the respective follow-up visits.

**CDF of Change in VinelandTM-II 2DC[1] from Baseline to Week 24 Stratified by OACIS-I Overall[2] Category (LAP_F)**

Abbreviations: CDF, Cumulative Distribution Function; OACIS-I, Ohio Autism Clinical Impression Scale of Improvement, LAP_F, Longitudinal Analysis Population Full

[1] The VinelandTM-II is a clinician assessment based on parent report. Domains include: Socialization, Communication, Daily Living Skills, and 2DC (a 2-domain composite score of Communication and Socialization). The total score is reported as the Adaptive Behavior Composite (ABC) Score. Higher score indicates better adaptive functioning.

[2] OACIS-I a clinician rating consisting of 4 one-item assessments: Overall, Verbal, Non-verbal, Social Interactions. Lower score indicates greater improvement.

[3] Longitudinal Analysis Population Full (LAP_F) includes participants from the full ITT who have provided responses at baseline and the respective follow-up visits.

**CDF of Change in VinelandTM-II 2DC[1] from Baseline to Week 24 Stratified by SPGI- Overall[2] Category (LAP_F)**

Abbreviations: CDF, Cumulative Distribution Function; SPGI, Study Partner Global Impression of Improvement, LAP_F, Longitudinal Analysis Population Full

[1] The VinelandTM-II is a clinician assessment based on parent report. Domains include: Socialization, Communication, Daily Living Skills, and 2DC (a 2-domain composite score of Communication and Socialization). The total score is reported as the Adaptive Behavior Composite (ABC) Score. Higher score indicates better adaptive functioning.

[2] SPGI has 4 one-item assessments: Overall symptoms, Communication, Socialization and Daily living skills. Lower score indicates greater improvement.

[3] Longitudinal Analysis Population Full (LAP_F) includes participants from the full ITT who have provided responses at baseline and the respective follow-up visits.

**CDF of Change in VinelandTM-II 2DC[1] from Baseline to Week 24 Stratified by CGI-I[2] Category (LAP_F)**

Abbreviations: CDF, Cumulative Distribution Function; CGI-I, Clinical Global Impression of Improvement, LAP_F, Longitudinal Analysis Population Full

[1] The VinelandTM-II is a clinician assessment based on parent report. Domains include: Socialization, Communication, Daily Living Skills, and 2DC (a 2-domain composite score of Communication and Socialization). The total score is reported as the Adaptive Behavior Composite (ABC) Score. Higher score indicates better adaptive functioning.

[2] CGI-I is a single-item measure assessing overall improvement. Lower score indicates greater improvement.

[3] Longitudinal Analysis Population Full (LAP_F) includes participants from the full ITT who have provided responses at baseline and the respective follow-up visits.

Figure S2. CDF curves showing Vineland™-II ABC score change from Baseline to Week 24.

**CDF of Change in VinelandTM-II Adaptive Behavior[1] from Baseline to Week 24 Stratified by OACIS-I Overall[2] Category (LAP_F)**

Abbreviations: CDF, Cumulative Distribution Function; OACIS-I, Ohio Autism Clinical Impression Scale of Improvement, LAP_F, Longitudinal Analysis Population Full

[1] The VinelandTM-II is a clinician assessment based on parent report. Domains include: Socialization, Communication, Daily Living Skills, and 2DC (a 2-domain composite score of Communication and Socialization). The total score is reported as the Adaptive Behavior Composite (ABC) Score. Higher score indicates better adaptive functioning.

[2] OACIS-I a clinician rating consisting of 4 one-item assessments: Overall, Verbal, Non-verbal, Social Interactions. Lower score indicates greater improvement.

[3] Longitudinal Analysis Population Full (LAP_F) includes participants from the full ITT who have provided responses at baseline and the respective follow-up visits.

**CDF of Change in VinelandTM-II Adaptive Behavior[1] from Baseline to Week 24 Stratified by SPGI- Overall[2] Category (LAP_F)**

Abbreviations: CDF, Cumulative Distribution Function; SPGI, Study Partner Global Impression of Improvement, LAP_F, Longitudinal Analysis Population Full

[1] The VinelandTM-II is a clinician assessment based on parent report. Domains include: Socialization, Communication, Daily Living Skills, and 2DC (a 2-domain composite score of Communication and Socialization). The total score is reported as the Adaptive Behavior Composite (ABC) Score. Higher score indicates better adaptive functioning.

[2] SPGI has 4 one-item assessments: Overall symptoms, Communication, Socialization and Daily living skills. Lower score indicates greater improvement.

[3] Longitudinal Analysis Population Full (LAP_F) includes participants from the full ITT who have provided responses at baseline and the respective follow-up visits.

**CDF of Change in VinelandTM-II Adaptive Behavior[1] from Baseline to Week 24 Stratified by CGI-I[2] Category (LAP_F)**

Abbreviations: CDF, Cumulative Distribution Function; CGI-I, Clinical Global Impression of Improvement, LAP_F, Longitudinal Analysis Population Full

[1] The VinelandTM-II is a clinician assessment based on parent report. Domains include: Socialization, Communication, Daily Living Skills, and 2DC (a 2-domain composite score of Communication and Socialization). The total score is reported as the Adaptive Behavior Composite (ABC) Score. Higher score indicates better adaptive functioning.

[2] CGI-I is a single-item measure assessing overall improvement. Lower score indicates greater improvement.

[3] Longitudinal Analysis Population Full (LAP_F) includes participants from the full ITT who have provided responses at baseline and the respective follow-up visits.

Figure S3. Communication SPPMC ratings by MCT and treatment allocation.

Y axis=number of participants, X axis: SPPMC ratings and MCT threshold met and unmet.

Abbreviations: VMI, very much improved; MI, much improved; MinI, minimally improved; NC, no change; MinW- minimally worse; Tx, treatment; PBO, placebo; SPPMC, Study Partner Perception of Meaningful Change; MCT, Meaningful Change Threshold; VAB-2DC, VinelandTM-II 2 Domain Composite Score

Figure S4. Daily living skills SPPMC ratings by MCT and treatment allocation.

Y axis=number of participants, X axis: SPPMC ratings and MCT threshold met and unmet.

Abbreviations: MCT, Meaningful Change Threshold; MI, much improved; MinI, minimally improved; MinW, minimally worse; MW, much worse; NC, no change; PBO, placebo; SPPMC, Study Partner Perception of Meaningful Change; Tx, treatment; VMI, very much improved

Figure S5. Socialization skills SPPMC ratings by MCT and treatment allocation.

Y axis=number of participants, X axis: CaPMC ratings and MCT threshold met and unmet.

Abbreviations: MCT, Meaningful Change Threshold; MI, much improved; MinI, minimally improved; MinW, minimally worse; NC, no change; PBO, placebo; SPPMC, Study Partner Perception of Meaningful Change; Tx, treatment; VMI, very much improved

Figure S6. Overall autism SPPMC ratings by MCT and treatment allocation.

Y axis=number of participants, X axis: SPPMC ratings and MCT threshold met and unmet.

Abbreviations: MCT, Meaningful Change Threshold; MI, much improved; MinI, minimally improved; MinW, minimally worse; NC, no change; PBO, placebo; SPPMC, Study Partner Perception of Meaningful Change; Tx, treatment; VMI, very much improved
